# Supplementary material for: Artificial Intelligence Reveals Distinct Prognostic Subgroups of Muscle-Invasive Bladder Cancer on Histology Images
Source: MDPI journal article supplement (doi:10.3390/cancers15204998), 2023-10-16
Supplement: s1 [file s1]

# Supplementary File S1

## Supplementary Tables for “Artificial Intelligence Reveals Distinct Prognostic Subgroups of Muscle-Invasive Bladder Cancer on Histology Images”

### Table of Contents

|                                       |                 |
|---------------------------------------|-----------------|
| <b><u>SIGNATURE LIST.....</u></b>     | <b><u>3</u></b> |
| <b><u>MICRORNA CLUSTER.....</u></b>   | <b><u>6</u></b> |
| <b><u>MUTATION IN TSC1.....</u></b>   | <b><u>6</u></b> |
| <b><u>MRNA CLUSTER.....</u></b>       | <b><u>7</u></b> |
| <b><u>MUTATION IN FGFR3.....</u></b>  | <b><u>7</u></b> |
| <b><u>LNCRNA CLUSTER.....</u></b>     | <b><u>7</u></b> |
| <b><u>MUTATION IN ERBB3.....</u></b>  | <b><u>7</u></b> |
| <b><u>MUTATION IN FAT1.....</u></b>   | <b><u>7</u></b> |
| <b><u>MUTATION IN PIK3CA.....</u></b> | <b><u>8</u></b> |
| <b><u>MUTATION IN KANSL1.....</u></b> | <b><u>8</u></b> |
| <b><u>MUTATION IN TMCO4.....</u></b>  | <b><u>9</u></b> |
| <b><u>MUTATION IN KDM6A.....</u></b>  | <b><u>9</u></b> |
| <b><u>MUTATION IN METTL3.....</u></b> | <b><u>9</u></b> |

|                                             |                  |
|---------------------------------------------|------------------|
| <b><u>SQUAMOUS PATHOLOGY .....</u></b>      | <b><u>9</u></b>  |
| <b><u>MUTATION IN PSIP1 .....</u></b>       | <b><u>9</u></b>  |
| <b><u>MUTATION IN ZNF773.....</u></b>       | <b><u>9</u></b>  |
| <b><u>HYPOMETHYLATION CLUSTER .....</u></b> | <b><u>9</u></b>  |
| <b><u>MUTATION IN GNA13.....</u></b>        | <b><u>10</u></b> |

## Signature list

| No. | Signature                        |
|-----|----------------------------------|
| 1   | Pathology classification         |
| 2   | Pathology abbreviated            |
| 3   | Inflammatory Infiltrate Response |
| 4   | Squamous pathology               |
| 5   | Neuroendocrine pathology         |
| 6   | Plasmacytoid pathology           |
| 7   | NOS pathology                    |
| 8   | mRNA cluster                     |
| 9   | Hypermethylation cluster         |
| 10  | Hypomethylation cluster          |
| 11  | microRNA cluster                 |
| 12  | lncRNA cluster                   |
| 13  | RPPA cluster                     |
| 14  | Mutation process cluster         |
| 15  | SMG SCNA cluster                 |
| 16  | mutation in TP53                 |
| 17  | mutation in RB1                  |
| 18  | mutation in RHOB                 |
| 19  | mutation in PIK3CA               |
| 20  | mutation in KDM6A                |
| 21  | mutation in TSC1                 |
| 22  | mutation in ELF3                 |
| 23  | mutation in KMT2D                |
| 24  | mutation in CREBBP               |
| 25  | mutation in CDKN1A               |
| 26  | mutation in EP300                |
| 27  | mutation in ZFP36L1              |
| 28  | mutation in ARID1A               |
| 29  | mutation in STAG2                |
| 30  | mutation in CDKN2A               |
| 31  | mutation in HRAS                 |
| 32  | mutation in KRAS                 |
| 33  | mutation in FBXW7                |
| 34  | mutation in ERCC2                |
| 35  | mutation in ASXL2                |
| 36  | mutation in RHOA                 |
| 37  | mutation in KMT2A                |

|    |                                         |
|----|-----------------------------------------|
| 38 | mutation in FGFR3                       |
| 39 | mutation in NFE2L2                      |
| 40 | mutation in KMT2C                       |
| 41 | mutation in PSIP1                       |
| 42 | mutation in KANSL1                      |
| 43 | mutation in C3orf70                     |
| 44 | mutation in FAT1                        |
| 45 | mutation in SPTAN1                      |
| 46 | mutation in RXRA                        |
| 47 | mutation in ZBTB7B                      |
| 48 | mutation in PTEN                        |
| 49 | mutation in ATM                         |
| 50 | mutation in KLF5                        |
| 51 | mutation in PARD3                       |
| 52 | mutation in CUL1                        |
| 53 | mutation in NRAS                        |
| 54 | mutation in SF3B1                       |
| 55 | mutation in GNA13                       |
| 56 | mutation in RBM10                       |
| 57 | mutation in ACTB                        |
| 58 | mutation in MBD1                        |
| 59 | mutation in CASP8                       |
| 60 | mutation in HIST1H3B                    |
| 61 | mutation in TAF11                       |
| 62 | mutation in ERBB2                       |
| 63 | mutation in NUP93                       |
| 64 | mutation in SF1                         |
| 65 | mutation in ERBB3                       |
| 66 | mutation in METTL3                      |
| 67 | mutation in SPN                         |
| 68 | mutation in MB21D2                      |
| 69 | mutation in SSH3                        |
| 70 | mutation in USP28                       |
| 71 | mutation in ASXL1                       |
| 72 | mutation in TMCO4                       |
| 73 | mutation in HES1                        |
| 74 | mutation in ZNF773                      |
| 75 | total number Single Nucleotide Variants |
| 76 | total number Indels                     |

|     |                                         |
|-----|-----------------------------------------|
| 77  | NMF based count C T_CpG mutations       |
| 78  | NMF based count ERCC2 mutations         |
| 79  | NMF based count APOBEC b mutations      |
| 80  | NMF based count APOBEC a mutations      |
| 81  | NMF based fraction C T_CpG mutations    |
| 82  | NMF based fraction ERCC2 mutations      |
| 83  | NMF based fraction APOBEC b mutations   |
| 84  | NMF based fraction APOBEC a mutations   |
| 85  | APOBEC induced mutation load PMACD      |
| 86  | APOBEC mutation load tertile            |
| 87  | ABSOLUTE call status                    |
| 88  | Tumor purity from ABSOLUTE              |
| 89  | Tumor ploidy from ABSOLUTE              |
| 90  | Genome doublings from ABSOLUTE          |
| 91  | Cancer DNA fraction from ABSOLUTE       |
| 92  | Subclonal genome fraction from ABSOLUTE |
| 93  | focal amplification in E2F3.SOX4        |
| 94  | focal amplification in PVRL4            |
| 95  | focal amplification in YWHAZ            |
| 96  | focal amplification in CCND1            |
| 97  | focal amplification in PPARG            |
| 98  | focal amplification in MDM2             |
| 99  | focal amplification in GATA3            |
| 100 | focal amplification in ZNF703           |
| 101 | focal amplification in CCNE1            |
| 102 | focal amplification in MYCL1            |
| 103 | focal amplification in BCL2L1           |
| 104 | focal amplification in TERT             |
| 105 | focal amplification in ERBB2            |
| 106 | focal amplification in MCL1             |
| 107 | focal amplification in EGFR             |
| 108 | focal amplification in AHR              |
| 109 | focal amplification in JAK2             |
| 110 | focal amplification in FGFR3            |
| 111 | focal amplification in KRAS             |
| 112 | focal deletion in CDKN2A                |
| 113 | focal deletion in RB1                   |
| 114 | focal deletion in PDE4D                 |
| 115 | focal deletion in CCSER1                |

|     |                          |
|-----|--------------------------|
| 116 | focal deletion in CREBBP |
| 117 | focal deletion in WWOX   |
| 118 | focal deletion in LRP1B  |
| 119 | focal deletion in PTEN   |
| 120 | focal deletion in ARID1A |
| 121 | focal deletion in NCOR1  |
| 122 | focal deletion in RAD51B |
| 123 | focal deletion in FHIT   |
| 124 | focal deletion in PTPRD  |
| 125 | focal deletion in KDM6A  |
| 126 | Neoantigen load          |
| 127 | HLA mutation             |
| 128 | Fusion in FGFR3          |
| 129 | Fusion in PPARG          |
| 130 | Fusion in PTPN13         |
| 131 | Fusion in RHOA           |
| 132 | Fusion in TNFRSF21       |
| 133 | Fusion in ASIP           |

## microRNA cluster

| Subtype | OR        | CI 95% (lower) | CI 95% (upper) | Fisher test | Rank | B-H critical value | Significance |
|---------|-----------|----------------|----------------|-------------|------|--------------------|--------------|
| 3       | 0.4891673 | 0.30949848     | 0.7675367      | 0.001237183 | 1    | 0.04               | *            |
| 1       | 1.7112831 | 1.00492709     | 2.9496735      | 0.042928036 | 2    | 0.08               | *            |
| ND      | 0.3243834 | 0.03166642     | 1.8416907      | 0.173849383 | 3    | 0.12               | nc           |
| 2       | 1.3007998 | 0.83483947     | 2.0323424      | 0.238318513 | 4    | 0.16               | nc           |
| 4       | 1.2302360 | 0.73087070     | 2.0801078      | 0.453396719 | 5    | 0.20               | nc           |

## mutation in TSC1

| Status | OR       | CI 95% (lower) | CI 95% (upper) | Fisher test | Rank | B-H critical value | Significance |
|--------|----------|----------------|----------------|-------------|------|--------------------|--------------|
| WT     | 2.811912 | 1.3106471      | 6.4519114      | 0.004093058 | 1    | 0.1                | *            |
| MUT    | 0.355630 | 0.1549928      | 0.7629819      | 0.004093058 | 2    | 0.2                | *            |

## mRNA cluster

| Subtype             | OR        | CI 95% (lower) | CI 95% (upper) | Fisher test | Rank | B-H critical value | Significance |
|---------------------|-----------|----------------|----------------|-------------|------|--------------------|--------------|
| Luminal_papillary   | 0.5503452 | 0.356269439    | 0.8460994      | 0.005136399 | 1    | 0.03333333         | *            |
| Basal_squamous      | 1.7430838 | 1.129631392    | 2.7027458      | 0.009110960 | 2    | 0.06666667         | *            |
| Neuronal            | 2.1968868 | 0.919444565    | 5.6586275      | 0.076581201 | 3    | 0.10000000         | *            |
| ND                  | 0.3276581 | 0.006201882    | 4.1192275      | 0.370745811 | 4    | 0.13333333         | nc           |
| Luminal_infiltrated | 0.8143632 | 0.477874711    | 1.3820029      | 0.447574880 | 5    | 0.16666667         | nc           |
| Luminal             | 1.0850770 | 0.426822692    | 2.7858274      | 1.000000000 | 6    | 0.20000000         | nc           |

## mutation in FGFR3

| Status | OR        | CI 95% (lower) | CI 95% (upper) | Fisher test | Rank | B-H critical value | Significance |
|--------|-----------|----------------|----------------|-------------|------|--------------------|--------------|
| WT     | 2.0577819 | 1.1532480      | 3.7485316      | 0.01016707  | 1    | 0.1                | *            |
| MUT    | 0.4859601 | 0.2667711      | 0.8671162      | 0.01016707  | 2    | 0.2                | *            |

## lncRNA cluster

| Subtype | OR        | CI 95% (lower) | CI 95% (upper) | Fisher test | Rank | B-H critical value | Significance |
|---------|-----------|----------------|----------------|-------------|------|--------------------|--------------|
| 3       | 0.4837417 | 0.2739837      | 0.8391926      | 0.006654241 | 1    | 0.04               | *            |
| 4       | 1.7092592 | 1.1165815      | 2.6275041      | 0.010342543 | 2    | 0.08               | *            |
| 2       | 0.7905216 | 0.4981848      | 1.2510181      | 0.318221280 | 3    | 0.12               | nc           |
| 1       | 1.2093942 | 0.7041715      | 2.0869989      | 0.517195051 | 4    | 0.16               | nc           |
| ND      | 0.9901708 | 0.1817876      | 5.3932136      | 1.000000000 | 5    | 0.20               | nc           |

## mutation in ERBB3

| Status | OR        | CI 95% (lower) | CI 95% (upper) | Fisher test | Rank | B-H critical value | Significance |
|--------|-----------|----------------|----------------|-------------|------|--------------------|--------------|
| WT     | 2.1902027 | 1.0990852      | 4.5361162      | 0.01792408  | 1    | 0.1                | *            |
| MUT    | 0.4565787 | 0.2204529      | 0.9098476      | 0.01792408  | 2    | 0.2                | *            |

## mutation in FAT1

| Status | OR        | CI 95% (lower) | CI 95% (upper) | Fisher test | Rank | B-H critical value | Significance |
|--------|-----------|----------------|----------------|-------------|------|--------------------|--------------|
| WT     | 0.5339163 | 0.2977397      | 0.9413875      | 0.02328952  | 1    | 0.1                | *            |
| MUT    | 1.8729526 | 1.0622618      | 3.3586387      | 0.02328952  | 2    | 0.2                | *            |

## mutation in PIK3CA

| Status | OR        | CI 95% (lower) | CI 95% (upper) | Fisher test | Rank | B-H critical value | Significance |
|--------|-----------|----------------|----------------|-------------|------|--------------------|--------------|
| WT     | 0.6035109 | 0.3680987      | 0.9818816      | 0.03596012  | 1    | 0.1                | *            |
| MUT    | 1.6569708 | 1.0184528      | 2.7166623      | 0.03596012  | 2    | 0.2                | *            |

## mutation in KANSL1

| Status | OR        | CI 95% (lower) | CI 95% (upper) | Fisher test | Rank | B-H critical value | Significance |
|--------|-----------|----------------|----------------|-------------|------|--------------------|--------------|
| WT     | 2.0690776 | 0.9841384      | 4.546840       | 0.04184239  | 1    | 0.1                | *            |
| MUT    | 0.4833072 | 0.2199330      | 1.016117       | 0.04184239  | 2    | 0.2                | *            |



## mutation in TMCO4

| Status | OR        | CI 95% (lower) | CI 95% (upper) | Fisher test | Rank | B-H critical value | Significance |
|--------|-----------|----------------|----------------|-------------|------|--------------------|--------------|
| WT     | 4.6910592 | 0.95414097     | 45.155757      | 0.03543734  | 1    | 0.1                | *            |
| MUT    | 0.2131715 | 0.02214557     | 1.048063       | 0.03543734  | 2    | 0.2                | *            |

## mutation in KDM6A

| Status | OR        | CI 95% (lower) | CI 95% (upper) | Fisher test | Rank | B-H critical value | Significance |
|--------|-----------|----------------|----------------|-------------|------|--------------------|--------------|
| WT     | 1.5842404 | 1.011445       | 2.4934236      | 0.03981648  | 1    | 0.1                | *            |
| MUT    | 0.6312173 | 0.401055       | 0.9886841      | 0.03981648  | 2    | 0.2                | *            |

## mutation in METTL3

| Status | OR       | CI 95% (lower) | CI 95% (upper) | Fisher test | Rank | B-H critical value | Significance |
|--------|----------|----------------|----------------|-------------|------|--------------------|--------------|
| WT     | 3.477753 | 0.87812271     | 19.952959      | 0.05269398  | 1    | 0.1                | *            |
| MUT    | 0.287542 | 0.05011788     | 1.138793       | 0.05269398  | 2    | 0.2                | *            |

## Squamous pathology

| Existence status | OR        | CI 95% (lower) | CI 95% (upper) | Fisher test | Rank | B-H critical value | Significance |
|------------------|-----------|----------------|----------------|-------------|------|--------------------|--------------|
| Absent           | 0.5472881 | 0.2776081      | 1.051119       | 0.06712539  | 1    | 0.1                | *            |
| Present          | 1.8271912 | 0.9513669      | 3.602200       | 0.06712539  | 2    | 0.2                | *            |

## mutation in PSIP1

| Status | OR       | CI 95% (lower) | CI 95% (upper) | Fisher test | Rank | B-H critical value | Significance |
|--------|----------|----------------|----------------|-------------|------|--------------------|--------------|
| WT     | 2.450398 | 0.8629208      | 7.944669       | 0.07018782  | 1    | 0.1                | *            |
| MUT    | 0.408097 | 0.1258706      | 1.158855       | 0.07018782  | 2    | 0.2                | *            |

## mutation in ZNF773

| Status | OR        | CI 95% (lower) | CI 95% (upper) | Fisher test | Rank | B-H critical value | Significance |
|--------|-----------|----------------|----------------|-------------|------|--------------------|--------------|
| WT     | 3.1145202 | 0.76275902     | 18.14406       | 0.08645945  | 1    | 0.1                | *            |
| MUT    | 0.3210767 | 0.05511445     | 1.31103        | 0.08645945  | 2    | 0.2                | *            |

## Hypomethylation cluster

| Subtype | OR        | CI 95% (lower) | CI 95% (upper) | Fisher test | Rank | B-H critical value | Significance |
|---------|-----------|----------------|----------------|-------------|------|--------------------|--------------|
| 4       | 0.4449481 | 0.1901593      | 0.9818698      | 0.03231970  | 1    | 0.04               | *            |
| 2       | 1.6759930 | 0.9604561      | 2.9648401      | 0.06443676  | 2    | 0.08               | *            |
| 3       | 0.8040387 | 0.4627858      | 1.3899148      | 0.43307045  | 3    | 0.12               | nc           |
| 1       | 1.1131818 | 0.7338594      | 1.6899079      | 0.61356526  | 4    | 0.16               | nc           |
| 5       | 0.9581662 | 0.5717707      | 1.6047348      | 0.90168307  | 5    | 0.20               | nc           |

## mutation in GNA13

| Status | OR        | CI 95% (lower) | CI 95% (upper) | Fisher test | Rank | B-H critical value | Significance |
|--------|-----------|----------------|----------------|-------------|------|--------------------|--------------|
| WT     | 2.5065931 | 0.8034681      | 9.257219       | 0.08828155  | 1    | 0.1                | *            |
| MUT    | 0.3989479 | 0.1080238      | 1.244604       | 0.08828155  | 2    | 0.2                | *            |
